# Supplementary material for: Aegicetus gehennae, a new late Eocene protocetid (Cetacea, Archaeoceti) from Wadi Al Hitan, Egypt, and the transition to tail-powered swimming in whales
Source: PubMed Central journal article supplement (PMC6905522; doi:10.1371/journal.pone.0225391), 2019-12-11
Supplement: pone.0225391.s001.pdf [file pone.0225391.s001.pdf]

**S1 Table. Online Hyperlinks for Three-Dimensional Images of Protoctetid *Aegicetus gehennae* Skeletal Elements (CGM 60584)**

| Image                                                                              | Hyperlink                   | Model ID | Image                                                                                | Hyperlink                   | Model ID |
|------------------------------------------------------------------------------------|-----------------------------|----------|--------------------------------------------------------------------------------------|-----------------------------|----------|
|    | <a href="#">Cervical C1</a> | 1348     |    | <a href="#">Cervical C2</a> | 1350     |
|    | <a href="#">Cervical C3</a> | 1351     |    | <a href="#">Cervical C4</a> | 1352     |
|    | <a href="#">Cervical C5</a> | 1353     |    | <a href="#">Cervical C6</a> | 1354     |
|   | <a href="#">Cervical C7</a> | 1355     |   | <a href="#">Thoracic T1</a> | 1356     |
|  | <a href="#">Thoracic T2</a> | 1357     |  | <a href="#">Thoracic T3</a> | 1358     |
|  | <a href="#">Thoracic T4</a> | 1359     |  | <a href="#">Thoracic T5</a> | 1360     |
|  | <a href="#">Thoracic T6</a> | 1361     |  | <a href="#">Thoracic T7</a> | 1362     |
|  | <a href="#">Thoracic T8</a> | 1363     |  | <a href="#">Thoracic T9</a> | 1364     |

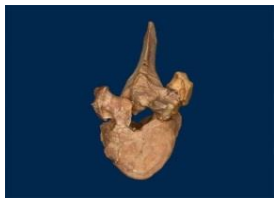

[Thoracic T10](#) 1365

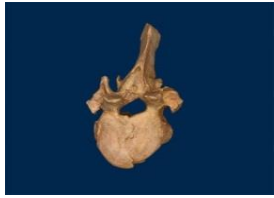

[Thoracic T12](#) 1367

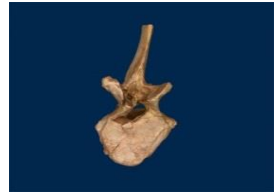

[Thoracic T14](#) 1370

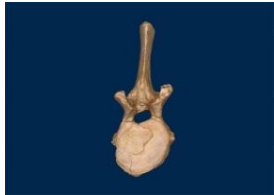

[Lumbar L1](#) 1372

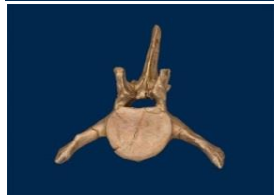

[Lumbar L3](#) 1374

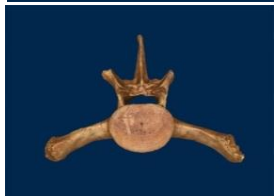

[Sacral S1](#) 1376

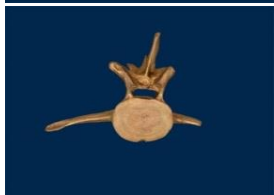

[Sacral S3](#) 1378

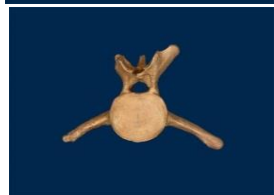

[Caudal Ca1](#) 1380

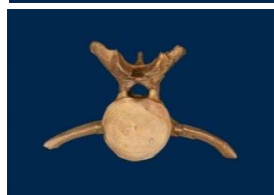

[Caudal Ca3](#) 1382

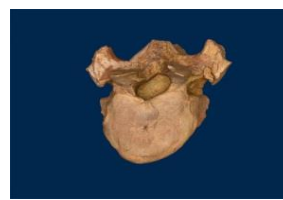

[Thoracic T11](#) 1366

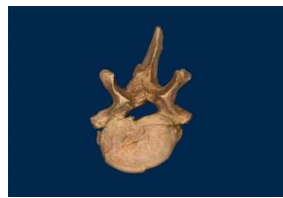

[Thoracic T13](#) 1369

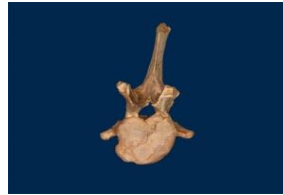

[Thoracic T15](#) 1371

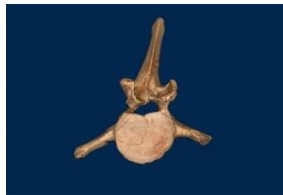

[Lumbar L2](#) 1373

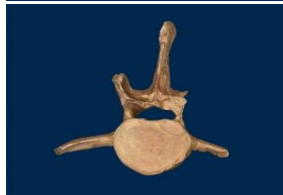

[Lumbar L4](#) 1375

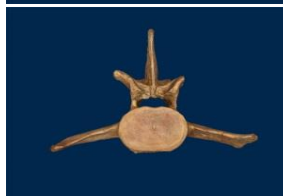

[Sacral S2](#) 1377

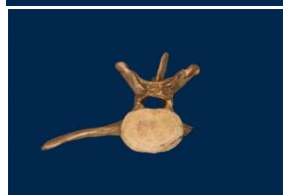

[Sacral S4](#) 1379

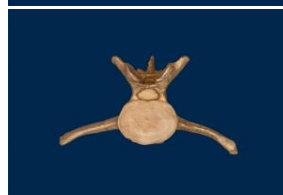

[Caudal Ca2](#) 1381

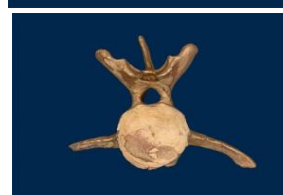

[Caudal Ca4](#) 1383

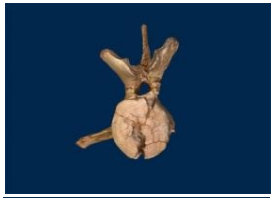

[Caudal Ca5](#) 1384

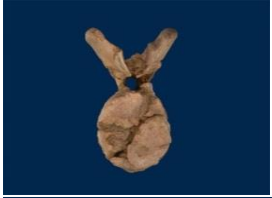

[Caudal Ca7](#) 1386

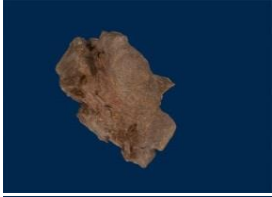

[Caudal Ca9](#) 1388

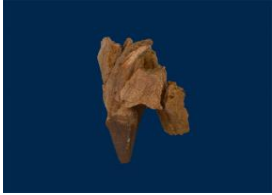

[R. maxilla](#) 1394

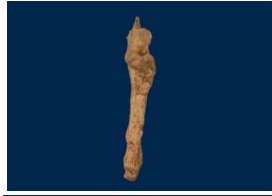

[L. ulna](#) 1396

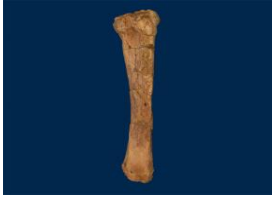

[R. tibia](#) 1398

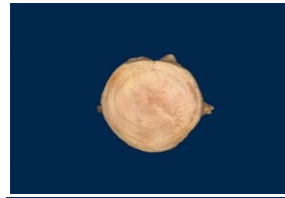

[Caudal Ca6](#) 1385

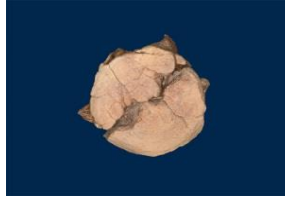

[Caudal Ca8](#) 1387

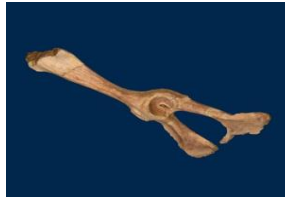

[L. innomin.](#) 1390

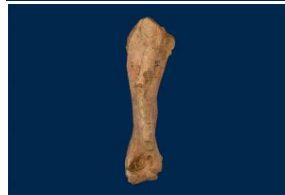

[L. humerus](#) 1395

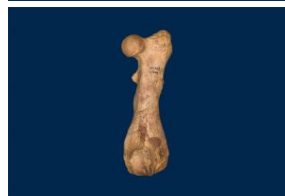

[L. femur](#) 1397
